# Supplementary material
Source: PubMed Central journal article supplement (PMC6827398)
Supplement: skz308_suppl_supplementary_figure_s1.pdf [file skz308_suppl_supplementary_figure_s1.pdf]

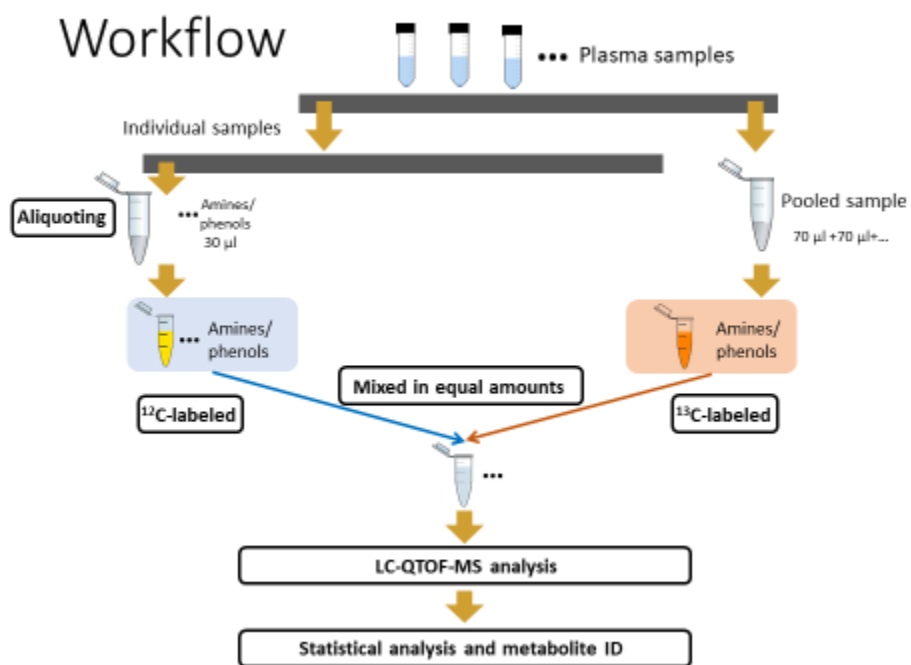

**Figure 1.** Workflow of the chemical isotope labeling/liquid chromatography–mass spectrometry method for analyzing the amine/phenol-containing submetabolome.

LC-QTOF-MS: fast liquid chromatography quadrupole time-of-flight mass spectrometry.
