# Supplementary material
Source: PubMed Central journal article supplement (PMC6827398)

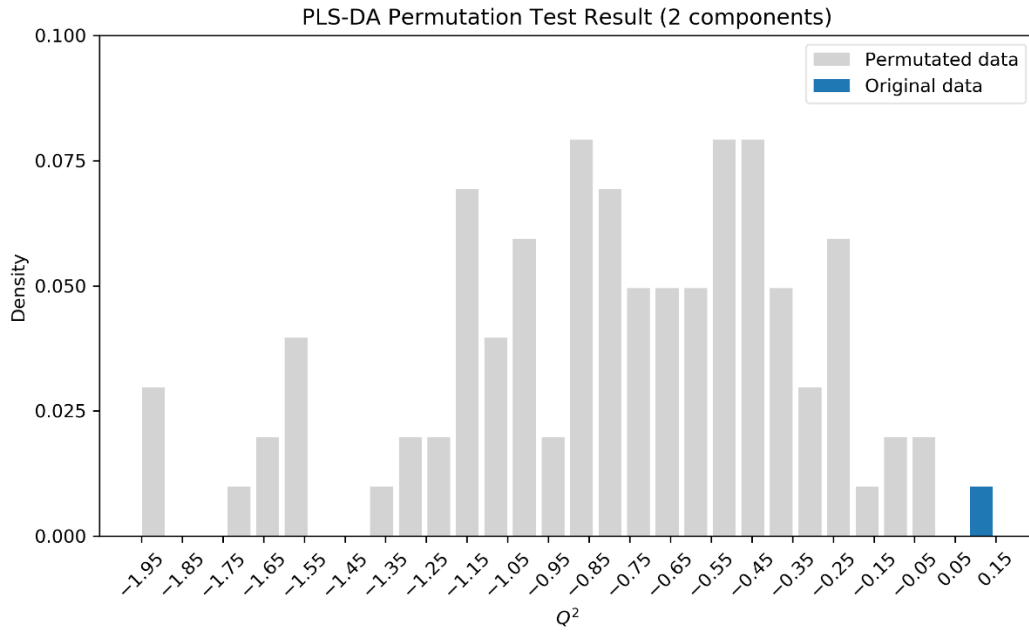

Supplement: skz308_suppl_supplementary_figure_s2.pdf [file skz308_suppl_supplementary_figure_s2.pdf]
